# Supplementary material for: Computational translation of genomic responses from experimental model systems to humans
Source: PLoS Comput Biol. 2019 Jan 10;15(1):e1006286. doi: 10.1371/journal.pcbi.1006286 (PMC6343937; doi:10.1371/journal.pcbi.1006286)
Supplement: S2 Table — (XLSX) [file pcbi.1006286.s002.xlsx]

## Sheet: Sheet1
S2 Table. Generalized linear model coefficients for the effect of machine learning model type and elastic net parameter on the F-score performance of machine learning classifiers.
Coefficient	Estimate	Standard Error	T Statistic	p Value
Intercept	0.11596	0.017395	6.6661	3.5248e-11
Model Type	0.0088087	0.002649	3.3253	0.00090168
Alpha	0.08122	0.019062	4.2609	2.1463e-05
